# Supplementary material for: Evolution of high-level resistance during low-level antibiotic exposure
Source: PubMed Central journal article supplement (PMC5913237; doi:10.1038/s41467-018-04059-1), 2018-04-23
Supplement: 41467_2018_4059_MOESM2_ESM.pdf [file 41467_2018_4059_MOESM2_ESM.pdf]

Supplementary Figures 1-2 and Supplementary Tables 1-8 for:

**Evolution of high-level resistance during  
low-level antibiotic exposure**

Wistrand-Yuen et al.

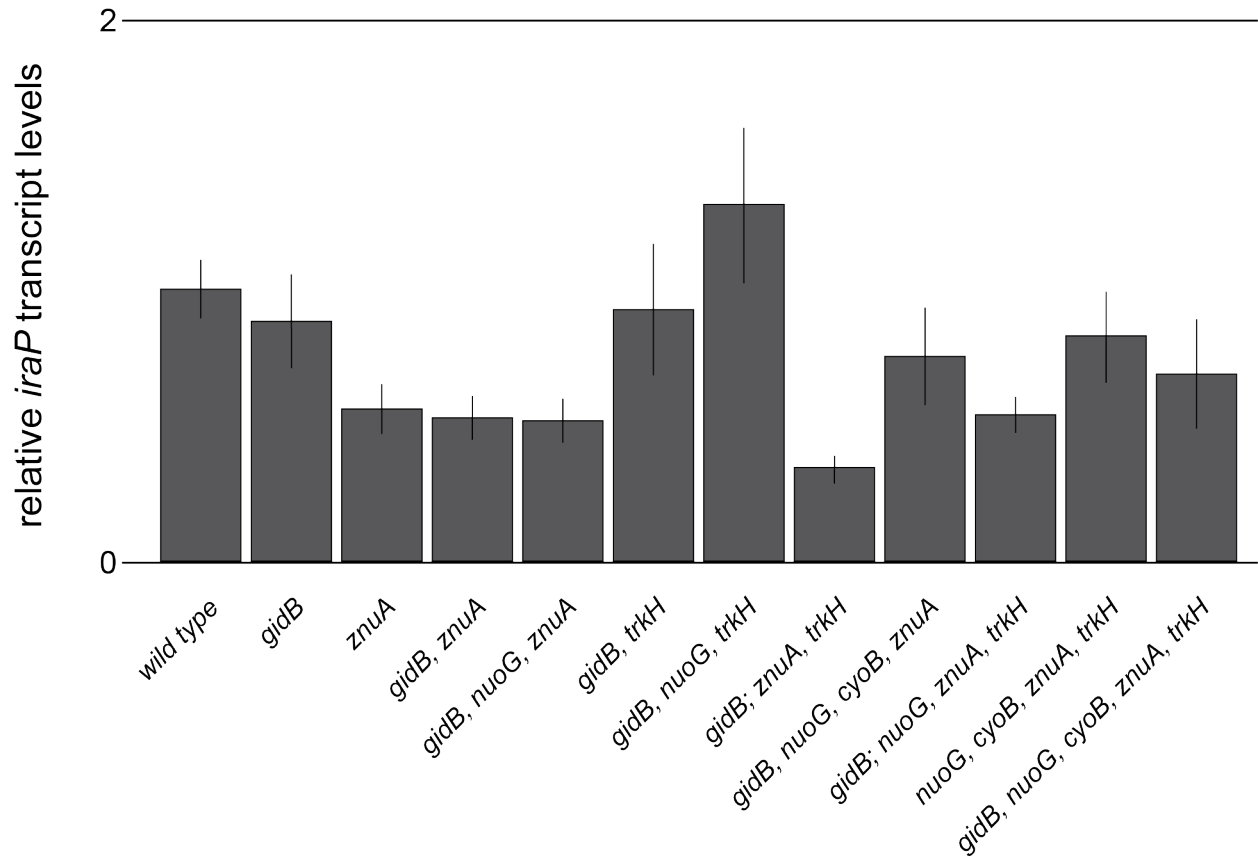

**Supplementary Figure 1.** Relative transcript levels of *iraP* in the wild type and selected mutants. No significant upregulation was observed in any of the samples. The values represent averages of 2 biological and 3 technical replicates. Error bars represent the standard deviation.

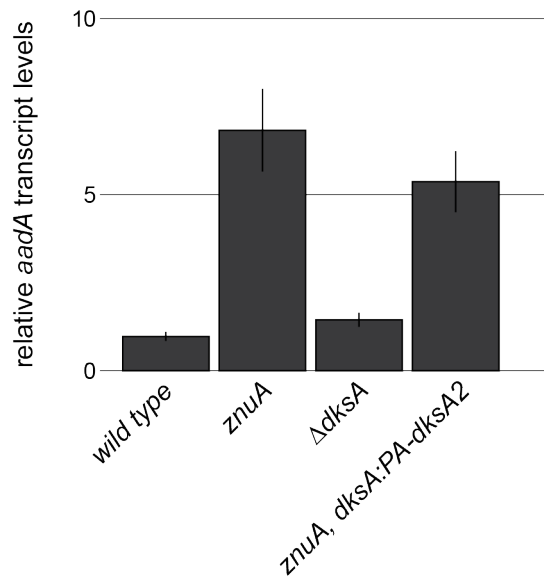

**Supplementary Figure 2.** Relative transcript levels of *aadA*. Expression of *aadA* was measured in wild type, reconstructed *znuA*-mutant, *dksA* knockout and a *znuA* mutant with a replacement of the native *dksA* gene with a zinc independent homologue from *Pseudomonas aeruginosa* (*PA-dksA2*). Error bars represent the standard deviation.

**Supplementary Table 1.** All mutations in the isolated mutants compared to wild type. Mutation types are single-nucleotide variants (SNVs), two or more SNVs in succession (MNVs), deletions and insertions. The symbol “\*” represents a stop codon, while “fs” represents a frame shift mutation.

| Strain  | Position | Type      | Annotation                                               | Amino acid change   |
|---------|----------|-----------|----------------------------------------------------------|---------------------|
| DA23868 | 85237    | SNV       | CDS: caiB                                                | Val54Ala            |
| DA23868 | 160039   | SNV       | CDS: secA                                                | Pro451Ser           |
| DA23868 | 225305   | SNV       | CDS: fhuA                                                | Thr523Ala           |
| DA23868 | 245972   | Insertion |                                                          |                     |
| DA23868 | 255731   | SNV       | CDS: tsf                                                 | Arg151Cys           |
| DA23868 | 297812   | Insertion | CDS: putative drug efflux protein                        | Val302fs            |
| DA23868 | 302541   | SNV       | CDS: yafS                                                | Pro130Leu           |
| DA23868 | 302560   | SNV       | CDS: yafS                                                |                     |
| DA23868 | 335622   | SNV       | CDS: putative RHS-like protein                           | Ala1024Val          |
| DA23868 | 364624   | Deletion  | CDS: cri                                                 | Phe35fs             |
| DA23868 | 370376   | SNV       |                                                          |                     |
| DA23868 | 470999   | Insertion |                                                          |                     |
| DA23868 | 547591   | SNV       | CDS: hemH                                                |                     |
| DA23868 | 680367   | Deletion  | CDS: rna                                                 | Asn145fs            |
| DA23868 | 682157   | SNV       | CDS: citT                                                | Tyr72Cys            |
| DA23868 | 723009   | SNV       | CDS: hscC                                                | Asp403Asn           |
| DA23868 | 985689   | SNV       | CDS: hypothetical protein, CDS: hypothetical protein     | His58Arg, Val150Ala |
| DA23868 | 1006741  | SNV       | CDS: putative nucleoside-diphosphate-sugar epimerase     | Tyr264His           |
| DA23868 | 1015778  | Insertion |                                                          |                     |
| DA23868 | 1133653  | Insertion | CDS: host specificity protein J                          | Ala294fs            |
| DA23868 | 1164914  | SNV       | CDS: yccS                                                | Val307Ala           |
| DA23868 | 1220293  | SNV       | CDS: putative inner membrane protein                     | Ala282Val           |
| DA23868 | 1258842  | Insertion | CDS: flgC                                                | Val64fs             |
| DA23868 | 1271172  | SNV       | CDS: rne                                                 | Tyr126His           |
| DA23868 | 1343532  | SNV       | CDS: putative ABC-type transport system ATPase component |                     |
| DA23868 | 1346537  | SNV       |                                                          |                     |
| DA23868 | 1357187  | SNV       | CDS: yeaL                                                | Leu71Pro            |
| DA23868 | 1363410  | Deletion  | Gene: yeaG                                               |                     |
| DA23868 | 1375969  | Deletion  | CDS: selD                                                | Arg126fs            |

|         |         |           |                                                    |            |
|---------|---------|-----------|----------------------------------------------------|------------|
| DA23868 | 1527411 | SNV       | CDS: tppB                                          | Trp179*    |
| DA23868 | 1582873 | SNV       | CDS: rspA                                          | His211Arg  |
| DA23868 | 1593976 | Deletion  |                                                    |            |
| DA23868 | 1599457 | SNV       | CDS: ydeA                                          |            |
| DA23868 | 1610520 | SNV       | CDS: putative hydrogenase protein                  | Asp55Asn   |
| DA23868 | 1618287 | SNV       | CDS: putative zinc-binding dehydrogenase           | Trp18*     |
| DA23868 | 1637147 | SNV       | CDS: putative glycosyl hydrolase                   | Val328Ala  |
| DA23868 | 1639479 | SNV       | CDS: putative glycosyl hydrolase                   |            |
| DA23868 | 1642462 | Insertion | CDS: putative alpha amylase                        | Ala12fs    |
| DA23868 | 1659045 | SNV       |                                                    |            |
| DA23868 | 1668866 | SNV       | CDS: nhoA                                          | Glu117Gly  |
| DA23868 | 1802376 | SNV       | CDS: yciM                                          | Thr102Ala  |
| DA23868 | 1845156 | SNV       | CDS: adhE                                          |            |
| DA23868 | 1862985 | SNV       | CDS: narK                                          | Thr318Ala  |
| DA23868 | 1870891 | SNV       | CDS: kdsA                                          |            |
| DA23868 | 1981602 | SNV       | CDS: yebK                                          | Ala41Thr   |
| DA23868 | 1984419 | SNV       | CDS: msbB                                          |            |
| DA23868 | 2064558 | SNV       | CDS: fliN                                          | Asp9Asn    |
| DA23868 | 2071971 | SNV       | CDS: yedI                                          | Ala274Val  |
| DA23868 | 2075768 | SNV       | RBS: RBS,                                          |            |
| DA23868 | 2092313 | SNV       | CDS: amn                                           |            |
| DA23868 | 2101006 | SNV       | CDS: cbiP                                          |            |
| DA23868 | 2149558 | Insertion |                                                    |            |
| DA23868 | 2190052 | Deletion  | CDS: wcaI                                          | Ile371fs   |
| DA23868 | 2197408 | SNV       | CDS: wcaC                                          |            |
| DA23868 | 2436280 | SNV       | CDS: nuoE                                          | Val69Ala   |
| DA23868 | 2469205 | SNV       | CDS: putative cytoplasmic protein                  | Ala183Thr  |
| DA23868 | 2690148 | SNV       | CDS: putative inner membrane protein               |            |
| DA23868 | 2712523 | Insertion | CDS: yfhD                                          | Val44fs    |
| DA23868 | 2739118 | Insertion | CDS: host specificity protein-J-like               | Leu561fs   |
| DA23868 | 2750091 | SNV       | CDS: minor capsid protein FII                      |            |
| DA23868 | 2783659 | SNV       | CDS: srmB                                          |            |
| DA23868 | 2836458 | SNV       | CDS: STM2689                                       | Val2959Ile |
| DA23868 | 2841809 | SNV       | CDS: putative ABC transporter transmembrane region |            |
| DA23868 | 2847103 | Insertion | CDS: phage tail-like protein                       | Val669fs   |
| DA23868 | 2858360 | SNV       | CDS: phage tail-like protein                       | Gly52Ser   |
| DA23868 | 2921898 | SNV       | CDS: iroD                                          |            |

|         |         |           |                                            |           |
|---------|---------|-----------|--------------------------------------------|-----------|
| DA23868 | 2930399 | Deletion  | CDS: mig-14                                | Lys269fs  |
| DA23868 | 2966261 | SNV       |                                            |           |
| DA23868 | 2970562 | SNV       | tRNA: tRNA-Ser                             |           |
| DA23868 | 2984651 | SNV       | CDS: ygaA                                  |           |
| DA23868 | 2996059 | SNV       | CDS: hycD                                  | Ile164Thr |
| DA23868 | 3052487 | SNV       | CDS: mutS                                  | Leu734Pro |
| DA23868 | 3060226 | SNV       | CDS: ygbK                                  | Arg165Cys |
| DA23868 | 3083757 | SNV       | CDS: putative cytoplasmic protein          | Phe94Leu  |
| DA23868 | 3089591 | SNV       | CDS: cysl                                  | Thr377Ala |
| DA23868 | 3101011 | SNV       | CDS: mazG                                  |           |
| DA23868 | 3111480 | SNV       | CDS: gudD                                  |           |
| DA23868 | 3129408 | SNV       | CDS: fucl                                  |           |
| DA23868 | 3132832 | SNV       | CDS: ygdE                                  |           |
| DA23868 | 3150051 | SNV       | CDS: ptr                                   | Arg831Cys |
| DA23868 | 3161257 | Insertion | CDS: ptsP                                  | Gln303fs  |
| DA23868 | 3186121 | SNV       | CDS: hypothetical protein                  | Arg133Cys |
| DA23868 | 3392258 | Deletion  |                                            |           |
| DA23868 | 3397070 | SNV       | CDS: yqjD                                  | Ala89Thr  |
| DA23868 | 3418947 | SNV       | CDS: garD                                  | Val91Ile  |
| DA23868 | 3445076 | SNV       | CDS: mtr                                   | Arg322Cys |
| DA23868 | 3532372 | SNV       | CDS: yhcQ                                  | Thr181Met |
| DA23868 | 3539635 | SNV       | CDS: yhdP                                  |           |
| DA23868 | 3541535 | SNV       | CDS: maf                                   | Thr125Ala |
| DA23868 | 3548156 | Insertion | CDS: putative sulfite oxidase subunit YedY | Met20fs   |
| DA23868 | 3563809 | SNV       | CDS: acrF                                  | Gly510Asp |
| DA23868 | 3587650 | SNV       | CDS: rpIO                                  |           |
| DA23868 | 3592121 | SNV       | CDS: rpIP                                  | Asp106Gly |
| DA23868 | 3676829 | Insertion |                                            |           |
| DA23868 | 3681105 | SNV       | CDS: rtcA                                  |           |
| DA23868 | 3681839 | SNV       | CDS: rtcB                                  | Ala240Thr |
| DA23868 | 3711068 | SNV       | CDS: gntU                                  |           |
| DA23868 | 3808106 | SNV       |                                            |           |
| DA23868 | 3945220 | SNV       | CDS: yicl                                  | Tyr551Cys |
| DA23868 | 3997538 | SNV       | CDS: ilvB                                  |           |
| DA23868 | 4049508 | SNV       | CDS: trmE                                  | Asp440Asn |
| DA23868 | 4063764 | SNV       | CDS: pstS                                  |           |
| DA23868 | 4064947 | SNV       | CDS: putative phosphotransferase system    | Ala338Val |

|         |         |           |                                                               |           |
|---------|---------|-----------|---------------------------------------------------------------|-----------|
| DA23868 | 4081716 | SNV       | CDS: gidB                                                     | Gln22*    |
| DA23868 | 4086386 | SNV       | CDS: yieM                                                     | Ala450Val |
| DA23868 | 4131118 | SNV       | CDS: rffG                                                     | Gln222*   |
| DA23868 | 4179218 | SNV       |                                                               |           |
| DA23868 | 4266460 | SNV       | CDS: yiiM                                                     |           |
| DA23868 | 4290951 | SNV       | CDS: yiiR                                                     | Met112Val |
| DA23868 | 4320353 | SNV       | CDS: katG                                                     |           |
| DA23868 | 4403441 | SNV       | CDS: aceA                                                     | Thr332Ala |
| DA23868 | 4441487 | SNV       | CDS: yjbF                                                     | Ala60Val  |
| DA23868 | 4448384 | SNV       | CDS: malE                                                     | Phe305Ser |
| DA23868 | 4553316 | SNV       | CDS: putative anaerobic dimethylsulfoxide reductase subunit B | Pro72Leu  |
| DA23868 | 4571807 | SNV       | CDS: fxsA                                                     | Pro103Ser |
| DA23868 | 4634053 | SNV       | CDS: cycA                                                     | Val143Ala |
| DA23868 | 4643962 | Insertion |                                                               |           |
| DA23868 | 4696458 | Insertion | Gene: treB                                                    |           |
| DA23868 | 4720045 | SNV       | CDS: pepA                                                     |           |
| DA23868 | 4739921 | Insertion | CDS: putative cytoplasmic protein                             | Glu79fs   |
| DA23868 | 4739981 | SNV       | CDS: putative cytoplasmic protein                             | Arg57His  |
| DA23868 | 4784944 | SNV       | CDS: putative cytoplasmic protein                             | Tyr81His  |
| DA23868 | 4842823 | SNV       | CDS: creA                                                     | Ala99Val  |
| DA23869 | 391     | SNV       | CDS: thrA                                                     | Arg19Cys  |
| DA23869 | 76853   | SNV       | CDS: carA                                                     | Leu325Pro |
| DA23869 | 81198   | SNV       | CDS: caiE                                                     | Val140Ala |
| DA23869 | 154309  | Insertion | CDS: ftsQ                                                     | Glu262fs  |
| DA23869 | 164202  | SNV       | CDS: guaC                                                     |           |
| DA23869 | 185131  | SNV       | CDS: yacH                                                     | Ala113Val |
| DA23869 | 230358  | Insertion |                                                               |           |
| DA23869 | 234939  | SNV       | CDS: stfE                                                     | Gly64Arg  |
| DA23869 | 245174  | SNV       | CDS: htrA                                                     | Thr228Ala |
| DA23869 | 248205  | SNV       | CDS: putative inner membrane protein                          | Thr85Met  |
| DA23869 | 252048  | SNV       | CDS: glnD                                                     | Ala257Thr |
| DA23869 | 258138  | SNV       | CDS: dxr                                                      | Met98Val  |
| DA23869 | 302704  | Insertion | CDS: yafS                                                     | Arg187fs  |
| DA23869 | 316973  | SNV       | CDS: putative cytoplasmic protein                             | Val27Ala  |
| DA23869 | 321982  | SNV       | CDS: hypothetical protein                                     | Pro291Ser |
| DA23869 | 326320  | SNV       | CDS: putative inner membrane protein                          | Asn820Ser |
| DA23869 | 342584  | SNV       | CDS: safA                                                     |           |

|         |         |           |                                                             |           |
|---------|---------|-----------|-------------------------------------------------------------|-----------|
| DA23869 | 350623  | SNV       |                                                             |           |
| DA23869 | 352334  | SNV       | CDS: yafV                                                   |           |
| DA23869 | 357677  | SNV       |                                                             |           |
| DA23869 | 368821  | SNV       | tRNA: thrW                                                  |           |
| DA23869 | 443225  | SNV       | CDS: rdgC                                                   | Val206Ala |
| DA23869 | 496334  | SNV       | CDS: cyoB                                                   | Gly283Asp |
| DA23869 | 496381  | SNV       | CDS: cyoB                                                   |           |
| DA23869 | 505578  | SNV       | CDS: lon                                                    |           |
| DA23869 | 513676  | Insertion | CDS: ybaE                                                   | Ser153fs  |
| DA23869 | 546507  | SNV       | CDS: adk                                                    | Thr155Ile |
| DA23869 | 622700  | SNV       |                                                             |           |
| DA23869 | 774925  | SNV       | CDS: phrB                                                   | Pro49Ser  |
| DA23869 | 806753  | SNV       | CDS: sucC                                                   |           |
| DA23869 | 904789  | SNV       | CDS: ybiS                                                   | Ala11Val  |
| DA23869 | 912823  | SNV       | CDS: pflF                                                   | Trp320*   |
| DA23869 | 1110307 | SNV       | CDS: hypothetical protein                                   |           |
| DA23869 | 1110316 | SNV       | CDS: hypothetical protein                                   |           |
| DA23869 | 1110325 | SNV       | CDS: hypothetical protein                                   |           |
| DA23869 | 1162292 | Insertion |                                                             |           |
| DA23869 | 1224740 | Insertion | tRNA: serX                                                  |           |
| DA23869 | 1232990 | Deletion  | RBS: RBS                                                    |           |
| DA23869 | 1254229 | SNV       | CDS: mviM                                                   |           |
| DA23869 | 1265494 | SNV       | CDS: flgK                                                   | Asn13Asp  |
| DA23869 | 1363410 | Deletion  | Gene: yeaG                                                  |           |
| DA23869 | 1405271 | SNV       | CDS: pfkB                                                   |           |
| DA23869 | 1487338 | Deletion  | Misc. feature: SPI-2, CDS: sseE                             | Ala100fs  |
| DA23869 | 1597469 | SNV       | CDS: marA                                                   | Met1?     |
| DA23869 | 1598486 | SNV       | CDS: marC                                                   |           |
| DA23869 | 1611940 | SNV       | CDS: putative Ni/Fe hydrogenase 1 b-type cytochrome subunit | Tyr34His  |
| DA23869 | 1633128 | SNV       | CDS: putative transcriptional regulator                     |           |
| DA23869 | 1650197 | SNV       | CDS: fdnH                                                   | Ser76Pro  |
| DA23869 | 1653692 | SNV       |                                                             |           |
| DA23869 | 1781866 | SNV       | CDS: pspA                                                   | Ala182Val |
| DA23869 | 1788214 | SNV       | CDS: sapF                                                   |           |
| DA23869 | 1885035 | SNV       | CDS: hydrogenase-1 small subunit                            |           |
| DA23869 | 1941094 | Deletion  |                                                             |           |
| DA23869 | 1987304 | Insertion | CDS: znuA                                                   | Ser19fs   |



|         |         |           |                                          |           |
|---------|---------|-----------|------------------------------------------|-----------|
| DA23869 | 1992784 | SNV       | CDS: yebB                                | Ser54Gly  |
| DA23869 | 1999723 | SNV       | CDS: yecO                                |           |
| DA23869 | 2016562 | SNV       |                                          |           |
| DA23869 | 2029377 | SNV       | RBS: RBS                                 |           |
| DA23869 | 2061641 | SNV       | CDS: fliJ                                | Gln115*   |
| DA23869 | 2085229 | Insertion |                                          |           |
| DA23869 | 2095178 | SNV       | CDS: yeeO                                | Gln219*   |
| DA23869 | 2178644 | SNV       |                                          |           |
| DA23869 | 2295767 | SNV       | CDS: putative regulatory protein         | Ala195Thr |
| DA23869 | 2433830 | SNV       | CDS: nuoG                                | Asp264Gly |
| DA23869 | 2446041 | SNV       | CDS: yfbT                                |           |
| DA23869 | 2503789 | SNV       | CDS: vacJ                                | Glu244Lys |
| DA23869 | 2592702 | SNV       | CDS: narQ                                | Thr314Met |
| DA23869 | 2742856 | SNV       | CDS: phage tail component M-like protein | *110Trp   |
| DA23869 | 2798241 | Insertion | rRNA: rRNA                               |           |
| DA23869 | 2816335 | SNV       | CDS: rimM                                |           |
| DA23869 | 2821018 | Insertion | CDS: putative cytoplasmic protein        | Leu25fs   |
| DA23869 | 2845190 | SNV       | CDS: late control-like protein           |           |
| DA23869 | 2912853 | SNV       | CDS: fijA                                |           |
| DA23869 | 2940273 | Insertion | CDS: gabD                                | Ala47fs   |
| DA23869 | 3069492 | SNV       | CDS: truD                                |           |
| DA23869 | 3079887 | SNV       | CDS: ygcH                                | Thr76Ala  |
| DA23869 | 3079906 | SNV       | CDS: ygcH                                |           |
| DA23869 | 3107032 | SNV       | CDS: barA                                | Val169Ala |
| DA23869 | 3143285 | SNV       | CDS: argA                                | Asp146Gly |
| DA23869 | 3147163 | SNV       | CDS: RecB                                | Val833Ala |
| DA23869 | 3169658 | SNV       | CDS: aas                                 |           |
| DA23869 | 3185444 | SNV       | CDS: putative cytoplasmic protein        | Val192Ala |
| DA23869 | 3245214 | SNV       | CDS: putative mannitol dehydrogenase     | Leu211Pro |
| DA23869 | 3257064 | SNV       | CDS: gshB                                | Met40Val  |
| DA23869 | 3287613 | SNV       | CDS: putative oxidoreductase             |           |
| DA23869 | 3368021 | SNV       | CDS: ygiF                                | Gln97Arg  |
| DA23869 | 3392258 | Deletion  |                                          |           |
| DA23869 | 3415077 | Insertion | Misc. RNA: rnpB                          |           |
| DA23869 | 3482894 | SNV       | CDS: yrbK                                | Ala119Thr |
| DA23869 | 3552533 | SNV       | CDS: panF                                | Val87Ala  |
| DA23869 | 3730830 | SNV       | CDS: livM                                |           |

|         |         |           |                                            |            |
|---------|---------|-----------|--------------------------------------------|------------|
| DA23869 | 3794167 | SNV       | CDS: yhjL                                  | Arg1083Cys |
| DA23869 | 3836547 | SNV       | CDS: cspA                                  |            |
| DA23869 | 3939879 | SNV       | CDS: gltS                                  | Pro375Ser  |
| DA23869 | 3965999 | SNV       | CDS: yicL                                  | Thr111Ala  |
| DA23869 | 3974022 | SNV       | CDS: putative transcriptional regulator    | Thr435Ala  |
| DA23869 | 3999035 | SNV       | CDS: integral membrane protein             | Ala136Thr  |
| DA23869 | 4003260 | SNV       | CDS: dsdX                                  |            |
| DA23869 | 4010699 | SNV       | CDS: yidQ                                  |            |
| DA23869 | 4028522 | SNV       | CDS: torS                                  | Met698Ile  |
| DA23869 | 4081275 | SNV       | CDS: gidB                                  | Gln169*    |
| DA23869 | 4096715 | SNV       | CDS: rbsR                                  | Leu65Pro   |
| DA23869 | 4158371 | Insertion | CDS: yigG                                  | Asp146fs   |
| DA23869 | 4192743 | SNV       | CDS: trkH                                  | Thr99Ala   |
| DA23869 | 4300185 | SNV       | CDS: ftsN                                  | Ala227Thr  |
| DA23869 | 4302505 | SNV       | CDS: priA                                  | Tyr611His  |
| DA23869 | 4446742 | SNV       | CDS: malF                                  | Gln412*    |
| DA23869 | 4519496 | SNV       | CDS: nrfE                                  | Thr296Ala  |
| DA23869 | 4600831 | Deletion  | CDS: mutL                                  | Trp121del  |
| DA23869 | 4706682 | SNV       | CDS: ornithine carbamoyltransferase        | Val124Ile  |
| DA23869 | 4793345 | SNV       | CDS: putative transcriptional regulator    | Glu833Gly  |
| DA23869 | 4798813 | Insertion | CDS: mdoB                                  | Arg654fs   |
| DA23869 | 4809418 | Insertion | tRNA: leuV                                 |            |
| DA23869 | 4818547 | SNV       | CDS: yjil                                  | Arg469His  |
| DA23872 | 50727   | SNV       | CDS: putative sodium galactoside symporter |            |
| DA23872 | 84700   | SNV       | CDS: caiB                                  | Tyr233Cys  |
| DA23872 | 122305  | SNV       | CDS: araC                                  |            |
| DA23872 | 171432  | SNV       | CDS: putative cytoplasmic protein          | Phe127Leu  |
| DA23872 | 193565  | SNV       | CDS: putative transcriptional regulator    |            |
| DA23872 | 205743  | SNV       | CDS: stiC                                  | Ser628Asn  |
| DA23872 | 207172  | SNV       | CDS: stiC                                  | Tyr152His  |
| DA23872 | 233564  | SNV       | CDS: stfC                                  | Ala754Val  |
| DA23872 | 242024  | SNV       | CDS: btuF                                  | Leu16Pro   |
| DA23872 | 267043  | SNV       | CDS: lpxA                                  |            |
| DA23872 | 310051  | Deletion  | CDS: putative cytoplasmic protein          | Thr261fs   |
| DA23872 | 321801  | Insertion | CDS: hypothetical protein                  | Ala232fs   |
| DA23872 | 327522  | SNV       | CDS: putative inner membrane protein       | Thr1221Ala |
| DA23872 | 347953  | SNV       |                                            |            |

|         |         |           |                                      |           |
|---------|---------|-----------|--------------------------------------|-----------|
| DA23872 | 389590  | SNV       | CDS: putative inner membrane protein | Ser31Gly  |
| DA23872 | 404378  | SNV       | CDS: mod                             |           |
| DA23872 | 428383  | SNV       | CDS: yaiV                            | Gln66*    |
| DA23872 | 446732  | SNV       | CDS: sbcC                            | Leu884Pro |
| DA23872 | 446962  | SNV       | CDS: sbcC                            |           |
| DA23872 | 561004  | SNV       | CDS: ybbJ                            | Gly142Asp |
| DA23872 | 573832  | SNV       | CDS: ybbB                            | Thr318Ala |
| DA23872 | 625777  | SNV       | CDS: ybdG                            | Val370Ala |
| DA23872 | 673838  | SNV       | CDS: putative oxidoreductase protein |           |
| DA23872 | 676897  | SNV       | CDS: putative hydrogenase protein    | Met120Val |
| DA23872 | 681121  | SNV       | CDS: citT                            |           |
| DA23872 | 685408  | SNV       | CDS: citE                            | Leu291Pro |
| DA23872 | 724743  | Insertion | CDS: putative cytoplasmic protein    | Leu263fs  |
| DA23872 | 779010  | SNV       | CDS: ybgJ                            |           |
| DA23872 | 796338  | SNV       | CDS: gltA                            |           |
| DA23872 | 840871  | SNV       | CDS: galE                            | Val244Ile |
| DA23872 | 919408  | Deletion  | CDS: yliA                            | Asp437fs  |
| DA23872 | 975401  | SNV       |                                      |           |
| DA23872 | 1018676 | Insertion | CDS: ybjY                            | Met24fs   |
| DA23872 | 1070548 | SNV       | CDS: msbA                            |           |
| DA23872 | 1099833 | SNV       |                                      |           |
| DA23872 | 1215181 | SNV       |                                      |           |
| DA23872 | 1224740 | Insertion | tRNA: serX                           |           |
| DA23872 | 1301502 | SNV       | CDS: mfd                             | Pro277Leu |
| DA23872 | 1556640 | SNV       | CDS: pntA                            | Arg318Cys |
| DA23872 | 1560683 | SNV       | CDS: ydgE                            | Gly31Ser  |
| DA23872 | 1642275 | SNV       | CDS: putative alpha amylase          | Val74Ala  |
| DA23872 | 1732273 | SNV       | CDS: hrpA                            | Arg968Cys |
| DA23872 | 1788452 | SNV       | CDS: sapF                            | Ser100Pro |
| DA23872 | 1813959 | SNV       | CDS: sohB                            |           |
| DA23872 | 1838108 | SNV       | CDS: oppC                            | Phe147Leu |
| DA23872 | 1862986 | Insertion | CDS: narK                            | Thr318fs  |
| DA23872 | 1879670 | SNV       | CDS: ychM                            |           |
| DA23872 | 1988406 | SNV       | CDS: znuB                            | Trp73*    |
| DA23872 | 2021974 | SNV       | CDS: flhD                            | Asp31Gly  |
| DA23872 | 2026179 | SNV       | CDS: araH                            | Asp170Gly |
| DA23872 | 2210000 | SNV       | CDS: yegE                            | Val491Ala |

|         |         |           |                                                                                             |           |
|---------|---------|-----------|---------------------------------------------------------------------------------------------|-----------|
| DA23872 | 2444194 | Deletion  | CDS: yfbS                                                                                   | Val543fs  |
| DA23872 | 2561611 | SNV       | CDS: hemF                                                                                   | Gly136Asp |
| DA23872 | 2615307 | SNV       | CDS: ppk                                                                                    | Arg124His |
| DA23872 | 2645744 | SNV       | CDS: ratA                                                                                   | Asp577Gly |
| DA23872 | 2646287 | SNV       | CDS: ratA                                                                                   | Asp396Gly |
| DA23872 | 2737238 | SNV       |                                                                                             |           |
| DA23872 | 2777392 | SNV       | CDS: rseC                                                                                   | Pro136Ser |
| DA23872 | 2823773 | SNV       | CDS: recN                                                                                   | Ser169Asn |
| DA23872 | 2824008 | SNV       | CDS: recN                                                                                   |           |
| DA23872 | 2925343 | SNV       | CDS: iroN                                                                                   |           |
| DA23872 | 2937830 | SNV       | RBS: RBS                                                                                    |           |
| DA23872 | 3094368 | SNV       |                                                                                             |           |
| DA23872 | 3168903 | SNV       | CDS: aas                                                                                    | His379Arg |
| DA23872 | 3175670 | Insertion | CDS: ygeA                                                                                   | Met10fs   |
| DA23872 | 3263489 | SNV       | CDS: yggW                                                                                   | Ile123Thr |
| DA23872 | 3279213 | SNV       | CDS: putative transcriptional regulator                                                     | Thr122Ala |
| DA23872 | 3344168 | SNV       | CDS: parE                                                                                   |           |
| DA23872 | 3359814 | SNV       | CDS: putative inner membrane protein                                                        | Ser9Asn   |
| DA23872 | 3631572 | Deletion  | CDS: bigA                                                                                   | His802fs  |
| DA23872 | 3678781 | SNV       | CDS: malT                                                                                   | Glu636*   |
| DA23872 | 3683699 | SNV       | CDS: putative ribonucleoprotein related-protein                                             | Asn319Ser |
| DA23872 | 3829179 | SNV       |                                                                                             |           |
| DA23872 | 3835753 | Insertion |                                                                                             |           |
| DA23872 | 3909892 | Insertion | CDS: rfaK                                                                                   | Gln265fs  |
| DA23872 | 3978385 | SNV       | CDS: nepI                                                                                   |           |
| DA23872 | 4068130 | SNV       | CDS: putative dipeptide/oligopeptide/nickel ABC-type transport system periplasmic component |           |
| DA23872 | 4081556 | SNV       | CDS: gidB                                                                                   | Gly75Glu  |
| DA23872 | 4244279 | SNV       | CDS: fdoG                                                                                   | Ala769Val |
| DA23872 | 4414847 | SNV       | CDS: yjbC                                                                                   | Tyr198Cys |
| DA23872 | 4504994 | SNV       | CDS: yjcD                                                                                   | Thr24Ala  |
| DA23872 | 4601391 | SNV       | CDS: mutL                                                                                   | Lys307Arg |
| DA23872 | 4621196 | SNV       | CDS: yjFP                                                                                   |           |
| DA23872 | 4642401 | Deletion  |                                                                                             |           |
| DA23872 | 4676758 | SNV       | RBS: RBS,                                                                                   |           |
| DA23872 | 4713625 | SNV       | CDS: ytgA                                                                                   |           |
| DA23872 | 4761505 | SNV       | CDS: trpS2                                                                                  | Tyr39Cys  |

|                |         |           |                                          |           |
|----------------|---------|-----------|------------------------------------------|-----------|
| <b>DA23872</b> | 4767281 | SNV       |                                          |           |
| <b>DA23874</b> | 3060    | Deletion  | CDS: thrB                                | Asn89fs   |
| <b>DA23874</b> | 100449  | SNV       | CDS: kefC                                | Met558Val |
| <b>DA23874</b> | 129259  | SNV       | CDS: leuD                                | Leu135Pro |
| <b>DA23874</b> | 218255  | Insertion | CDS: ligT                                | Ala10fs   |
| <b>DA23874</b> | 237104  | Insertion | CDS: putative outer membrane protein     |           |
| <b>DA23874</b> | 253245  | SNV       | CDS: map                                 |           |
| <b>DA23874</b> | 272135  | SNV       | CDS: dnaE                                | Phe863Leu |
| <b>DA23874</b> | 337446  | Insertion | CDS: putative RHS-like protein           | Leu120fs  |
| <b>DA23874</b> | 417817  | Deletion  |                                          |           |
| <b>DA23874</b> | 496416  | SNV       | CDS: cyoB                                | Asp256Asn |
| <b>DA23874</b> | 518970  | SNV       | CDS: mdlB                                |           |
| <b>DA23874</b> | 661009  | SNV       | CDS: ybdB                                | Gln110*   |
| <b>DA23874</b> | 673098  | SNV       |                                          |           |
| <b>DA23874</b> | 793807  | SNV       | CDS: putative cytoplasmic protein        |           |
| <b>DA23874</b> | 794629  | SNV       | CDS: nei                                 |           |
| <b>DA23874</b> | 977144  | Insertion | CDS: hypothetical protein                | Gln113fs  |
| <b>DA23874</b> | 1048863 | SNV       | CDS: dmsC                                | Phe156Leu |
| <b>DA23874</b> | 1117553 | SNV       | CDS: hypothetical protein                | Lys232Glu |
| <b>DA23874</b> | 1128378 | Insertion | CDS: probable minor tail protein         | Asn792fs  |
| <b>DA23874</b> | 1128798 | SNV       | CDS: probable minor tail protein         |           |
| <b>DA23874</b> | 1198420 | SNV       |                                          |           |
| <b>DA23874</b> | 1232990 | Deletion  | RBS: RBS                                 |           |
| <b>DA23874</b> | 1275289 | SNV       | CDS: yceD                                |           |
| <b>DA23874</b> | 1292479 | SNV       | CDS: thiK                                | Ile240Val |
| <b>DA23874</b> | 1375139 | Insertion | CDS: ydjA                                | Asp72fs   |
| <b>DA23874</b> | 1375969 | Insertion | CDS: selD                                | Arg126fs  |
| <b>DA23874</b> | 1383031 | SNV       | CDS: argD                                |           |
| <b>DA23874</b> | 1412250 | SNV       | CDS: thrS                                |           |
| <b>DA23874</b> | 1593976 | Deletion  |                                          |           |
| <b>DA23874</b> | 1672348 | SNV       | CDS: putative outer membrane lipoprotein | Asn30Asp  |
| <b>DA23874</b> | 1689722 | SNV       | CDS: ydcR                                | Glu31Gly  |
| <b>DA23874</b> | 1696210 | Deletion  | CDS: ydcN                                | Met1?     |
| <b>DA23874</b> | 1739562 | SNV       | CDS: ydbH                                | Thr75Ala  |
| <b>DA23874</b> | 1945674 | SNV       | CDS: yebS                                |           |
| <b>DA23874</b> | 1948551 | Insertion |                                          |           |
| <b>DA23874</b> | 1964193 | Insertion | CDS: mig-3                               | Glu55fs   |

|         |         |           |                                                   |                      |
|---------|---------|-----------|---------------------------------------------------|----------------------|
| DA23874 | 2011348 | Insertion | CDS: flhB                                         | Arg29fs              |
| DA23874 | 2021974 | SNV       | CDS: flhD                                         | Asp31Gly             |
| DA23874 | 2025489 | SNV       | CDS: otsB                                         |                      |
| DA23874 | 2191482 | Insertion | CDS: wcaH                                         | Ala61fs              |
| DA23874 | 2191634 | SNV       | CDS: wcaH, CDS: wcaG                              | *322Trp,<br>Asp10Gly |
| DA23874 | 2237713 | SNV       | CDS: yegU                                         | Phe59Ser             |
| DA23874 | 2256471 | SNV       | CDS: yehV                                         |                      |
| DA23874 | 2268330 | SNV       | CDS: yohF                                         | Thr145Ala            |
| DA23874 | 2272816 | SNV       | CDS: salicylate hydroxylase                       | Pro50Ser             |
| DA23874 | 2337127 | SNV       | CDS: hypothetical protein                         | Ser20Gly             |
| DA23874 | 2507250 | SNV       |                                                   |                      |
| DA23874 | 2539831 | SNV       | CDS: ligA                                         | Pro396Ser            |
| DA23874 | 2585981 | SNV       | CDS: ypfG                                         |                      |
| DA23874 | 2656147 | SNV       |                                                   |                      |
| DA23874 | 2677887 | SNV       | CDS: fdx                                          | Thr104Ala            |
| DA23874 | 2696935 | SNV       | CDS: cadC                                         |                      |
| DA23874 | 2787988 | SNV       | CDS: yfiF                                         | Val156Ala            |
| DA23874 | 2828043 | Insertion | CDS: STM2689                                      | Asp156fs             |
| DA23874 | 2864334 | SNV       | CDS: terminase-like protein                       | Phe99Leu             |
| DA23874 | 2923168 | SNV       | CDS: iroE                                         |                      |
| DA23874 | 2949760 | SNV       | CDS: putative regulatory protein                  |                      |
| DA23874 | 2954321 | SNV       | CDS: nrdE                                         | Arg612His            |
| DA23874 | 3017731 | SNV       | Misc. feature: SPI-1, TTSS-1                      |                      |
| DA23874 | 3037974 | SNV       | Misc. feature: SPI-1, TTSS-1, CDS: invC           | Thr3Ala              |
| DA23874 | 3147016 | SNV       | CDS: RecB                                         | Ala882Asp            |
| DA23874 | 3160713 | SNV       | CDS: ptsP                                         | Gln484*              |
| DA23874 | 3164027 | Deletion  | CDS: mutH                                         | Asn216fs             |
| DA23874 | 3185632 | SNV       | CDS: putative cytoplasmic protein                 |                      |
| DA23874 | 3188195 | SNV       | CDS: stdC                                         | Arg95Cys             |
| DA23874 | 3206917 | SNV       | RBS: RBS,                                         |                      |
| DA23874 | 3285551 | SNV       | CDS: putative amino acid transporter              | Thr457Ala            |
| DA23874 | 3315175 | SNV       | CDS: putative methyl-accepting chemotaxis protein |                      |
| DA23874 | 3326574 | SNV       | CDS: putative cation transporter                  |                      |
| DA23874 | 3376866 | SNV       | CDS: rpoD                                         | Val153Ala            |
| DA23874 | 3468761 | SNV       | CDS: dacB                                         | Ala34Thr             |
| DA23874 | 3501490 | SNV       | CDS: yhcG                                         | Ala289Thr            |

|         |         |           |                                                                                      |           |
|---------|---------|-----------|--------------------------------------------------------------------------------------|-----------|
| DA23874 | 3587680 | SNV       | CDS: rplO                                                                            |           |
| DA23874 | 3666047 | SNV       | CDS: feoB                                                                            | Ala634Thr |
| DA23874 | 3679441 | SNV       | CDS: malT                                                                            | Ile856Val |
| DA23874 | 3796464 | SNV       | CDS: yhjL                                                                            | Gln317Arg |
| DA23874 | 3824219 | SNV       | CDS: lpfC                                                                            | Met801Lys |
| DA23874 | 3882244 | SNV       | CDS: putative inner membrane protein                                                 | Ala347Val |
| DA23874 | 3942757 | SNV       | CDS: yicH                                                                            | Arg6Met   |
| DA23874 | 3995090 | SNV       | CDS: putative regulatory protein                                                     | Val93Ala  |
| DA23874 | 4081275 | SNV       | CDS: gidB                                                                            | Gln169*   |
| DA23874 | 4095010 | SNV       | CDS: rbsB                                                                            | Ala149Val |
| DA23874 | 4116110 | SNV       | CDS: putative cytoplasmic protein                                                    |           |
| DA23874 | 4387155 | SNV       |                                                                                      |           |
| DA23874 | 4409829 | SNV       | CDS: metH                                                                            |           |
| DA23874 | 4444719 | SNV       | CDS: yjbH                                                                            | Thr670Met |
| DA23874 | 4532538 | SNV       | CDS: basR                                                                            | Arg210His |
| DA23874 | 4647665 | SNV       | CDS: ytfN                                                                            | Thr369Ala |
| DA23874 | 4671944 | Deletion  | Misc. feature: putative sugar kinase, ribokinase family, contains frameshift         |           |
| DA23874 | 4716168 | SNV       | CDS: valS                                                                            | Gly828Ser |
| DA23874 | 4719833 | SNV       | CDS: pepA                                                                            | Val303Ala |
| DA23874 | 4728461 | SNV       | CDS: idnK                                                                            | His157Arg |
| DA23874 | 4739921 | Insertion | CDS: putative cytoplasmic protein                                                    | Glu79fs   |
| DA23874 | 4740249 | SNV       | CDS: putative cytoplasmic protein                                                    |           |
| DA23874 | 4741935 | SNV       | CDS: putative ABC-type sugar/spermidine/putrescine transport system ATPase component | Gly37Arg  |
| DA23874 | 4809426 | SNV       | tRNA: leuV                                                                           |           |
| DA23874 | 4809658 | SNV       | tRNA: leuQ                                                                           |           |
| DA23877 | 2021643 | SNV       | CDS: flhC                                                                            | Ala24Ser  |
| DA23877 | 3252058 | SNV       | CDS: metK                                                                            | Gln120Leu |
| DA23877 | 3678860 | SNV       | CDS: malT                                                                            | Leu662*   |
| DA23877 | 4081563 | SNV       | CDS: gidB                                                                            | Asp73Asn  |
| DA23879 | 656069  | MNV       |                                                                                      |           |
| DA23879 | 1685668 | Deletion  | CDS: srfC                                                                            | Asp536fs  |
| DA23879 | 3677833 | Deletion  | CDS: malT                                                                            | Tyr320fs  |
| DA23879 | 4081582 | Insertion | CDS: gidB                                                                            | Gln67fs   |

**Supplementary Table 2.** Epistatic interaction terms based on background-averaged epistasis ( $\epsilon$ ) and on epistatic terms relative to the wild type sequence ( $\lambda$ ). The different reconstructed variants are listed in binary order, and the phenotypic resistance values were linearized as  $\log_2(\text{MIC})$  to fit the linear epistasis model.

| Strain number | Binary genotype <sup>1</sup> | Interaction terms <sup>1</sup> | MIC streptomycin (mg L <sup>-1</sup> ) | $\log_2(\text{MIC})$ $y$ | Background-averaged epistasis $\epsilon$ | Epistatic term $\lambda$ |
|---------------|------------------------------|--------------------------------|----------------------------------------|--------------------------|------------------------------------------|--------------------------|
| DA6192        | 00000                        | *****                          | 4                                      | 2                        | 5.24                                     | 2                        |
| DA40124       | 00001                        | ****1                          | 3                                      | 1.58                     | 0.05                                     | -0.42                    |
| DA39336       | 00010                        | ***1*                          | 6                                      | 2.58                     | 0.95                                     | 0.58                     |
| DA40128       | 00011                        | ***11                          | 4                                      | 2                        | 0.11                                     | -0.17                    |
| DA40118       | 00100                        | **1**                          | 8                                      | 3                        | 1.33                                     | 1                        |
| DA40482       | 00101                        | **1*1                          | 12                                     | 3.58                     | 0.16                                     | 1                        |
| DA40122       | 00110                        | **11*                          | 12                                     | 3.58                     | 0.05                                     | 0                        |
| DA40381       | 00111                        | **111                          | 16                                     | 4                        | 0.10                                     | 0                        |
| DA39332       | 01000                        | *1***                          | 8                                      | 3                        | 1.53                                     | 1                        |
| DA40126       | 01001                        | *1**1                          | 6                                      | 2.58                     | 0.05                                     | 0                        |
| DA40130       | 01010                        | *1*1*                          | 16                                     | 4                        | 0.45                                     | 0.42                     |
| DA40385       | 01011                        | *1*11                          | 12                                     | 3.58                     | -0.10                                    | 0.17                     |
| DA40120       | 01100                        | *11**                          | 16                                     | 4                        | -0.09                                    | 0                        |
| DA40378       | 01101                        | *11*1                          | 16                                     | 4                        | -0.60                                    | -0.58                    |
| DA40389       | 01110                        | *111*                          | 32                                     | 5                        | 1.19                                     | 0                        |
| DA40469       | 01111                        | *1111                          | 32                                     | 5                        | 1.21                                     | 0                        |
| DA40134       | 10000                        | 1****                          | 32                                     | 5                        | 3.80                                     | 3                        |
| DA40473       | 10001                        | 1***1                          | 24                                     | 4.58                     | 0.30                                     | 0                        |
| DA40142       | 10010                        | 1**1*                          | 64                                     | 6                        | 0.41                                     | 0.42                     |
| DA40477       | 10011                        | 1**11                          | 96                                     | 6.58                     | 0.40                                     | 1.17                     |
| DA40471       | 10100                        | 1*1**                          | 96                                     | 6.58                     | -0.05                                    | 0.58                     |
| DA40483       | 10101                        | 1*1*1                          | 96                                     | 6.58                     | -1.10                                    | -0.58                    |
| DA40383       | 10110                        | 1*11*                          | 128                                    | 7                        | 0.10                                     | -0.58                    |
| DA40463       | 10111                        | 1*111                          | 128                                    | 7                        | 0.21                                     | -1                       |
| DA40138       | 11000                        | 11***                          | 96                                     | 6.58                     | 0.84                                     | 0.58                     |
| DA40475       | 11001                        | 11**1                          | 192                                    | 7.58                     | 0.52                                     | 1.42                     |
| DA40387       | 11010                        | 11*1*                          | 192                                    | 7.58                     | -0.10                                    | -0.42                    |
| DA40465       | 11011                        | 11*11                          | 256                                    | 8                        | -0.55                                    | -1.75                    |
| DA40379       | 11100                        | 111**                          | 256                                    | 8                        | 0.40                                     | -0.17                    |
| DA40461       | 11101                        | 111*1                          | 192                                    | 7.58                     | -0.04                                    | -1.25                    |
| DA40467       | 11110                        | 1111*                          | 768                                    | 9.58                     | 2.38                                     | 1.17                     |
| DA40479       | 11111                        | 11111                          | 1024                                   | 10                       | 2.42                                     | 2.42                     |

<sup>1</sup> The five genes are *gidB*, *nuoG*, *cyoB*, *znuA* and *trkH*, corresponding to the bits in the binary genotype column in left-to-right order.



**Supplementary Table 3.** Relative growth rate and mutation rates of isolated mutants. The growth rate of the ancestral wild type strain DA6192 is set to 1.0. Fitness was measured as exponential growth rate in Mueller Hinton medium at 37°C. Mutation rates  $\mu$  are the estimated rates per cell per division corrected by the plating efficiency, and they were calculated using the bz-rates web tool<sup>1</sup>.

| <b>Strain</b>  | <b>Relative growth rate</b> | <b>Relative growth rate SD</b> | <b>Mutation rate <math>\mu</math></b> |
|----------------|-----------------------------|--------------------------------|---------------------------------------|
| <b>DA6192</b>  | 1                           | 0.0262                         | 2.1e-09                               |
| <b>DA23868</b> | 0.96                        | 0.0177                         | 1.9e-07                               |
| <b>DA23869</b> | 0.89                        | 0.0260                         | 2.9e-07                               |
| <b>DA23872</b> | 0.92                        | 0.0177                         | 3.2e-07                               |
| <b>DA23874</b> | 0.98                        | 0.0168                         | 3.9e-07                               |

**Supplementary Table 4.** Populations evolved above MIC. Mutations in the 5 populations of *S. typhimurium* evolved in MH medium containing 200 mg L<sup>-1</sup> streptomycin for 100 generations compared to wild type. Mutation types are single-nucleotide variants (SNVs), deletions and insertions, and “fs” represents a frame shift mutation. All mutations detected in >3 reads are listed.

| Strain  | Position | Type     | Frequency | Annotation                   | Amino acid change |
|---------|----------|----------|-----------|------------------------------|-------------------|
| DA60384 | 3602590  | SNV      | 100.00    | CDS: rpsL                    | Lys43Arg          |
| DA60384 | 2174308  | Deletion | 23.81     | CDS: rfbI                    | Gly268fs          |
| DA60385 | 3602590  | SNV      | 100.00    | CDS: rpsL                    | Lys43Arg          |
| DA60385 | 2173959  | SNV      | 36.36     | CDS: rfbF                    | Tyr55Asp          |
| DA60386 | 3602590  | SNV      | 100.00    | CDS: rpsL                    | Lys43Arg          |
| DA60386 | 2171585  | SNV      | 20.41     | CDS: rfbH                    | Pro218Leu         |
| DA60386 | 1853325  | SNV      | 11.43     |                              |                   |
| DA60386 | 2173649  | SNV      | 10.00     | CDS: rfbF                    | Pro158Leu         |
| DA60387 | 3602590  | SNV      | 100.00    | CDS: rpsL                    | Lys43Arg          |
| DA60387 | 2168404  | SNV      | 36.36     | CDS: rfbV                    | Pro72Leu          |
| DA60387 | 2852125  | SNV      | 35.90     | CDS: hypothetical protein    |                   |
| DA60387 | 2852155  | SNV      | 14.29     | CDS: hypothetical protein    |                   |
| DA60387 | 2854636  | SNV      | 11.11     | CDS: phage tail-like protein |                   |
| DA60388 | 3602590  | SNV      | 100.00    | CDS: rpsL                    | Lys43Arg          |
| DA60388 | 2168088  | Deletion | 31.58     | CDS: rfbV                    | Glu178fs          |
| DA60388 | 3052876  | SNV      | 14.29     |                              |                   |

**Supplementary Table 5.** Isolated resistant mutants. Mutants of *S. typhimurium* clones isolated from serial passage in MH medium containing 1 mg L<sup>-1</sup> streptomycin for 900 generations.

| <b>Strain</b>  | <b>Genotype</b>                                                                                      | <b>Reference</b> |
|----------------|------------------------------------------------------------------------------------------------------|------------------|
| <b>DA23866</b> | Mutant isolated by plating a serial passage population on 256 mg/L streptomycin, Lineage 10, Clone 1 | This study       |
| <b>DA23867</b> | Mutant isolated by plating a serial passage population on 256 mg/L streptomycin, Lineage 10, Clone 2 | This study       |
| <b>DA23868</b> | Mutant isolated by plating a serial passage population on 256 mg/L streptomycin, Lineage 10, Clone 3 | This study       |
| <b>DA23869</b> | Mutant isolated by plating a serial passage population on 256 mg/L streptomycin, Lineage 19, Clone 1 | This study       |
| <b>DA23870</b> | Mutant isolated by plating a serial passage population on 256 mg/L streptomycin, Lineage 19, Clone 2 | This study       |
| <b>DA23871</b> | Mutant isolated by plating a serial passage population on 256 mg/L streptomycin, Lineage 19, Clone 3 | This study       |
| <b>DA23872</b> | Mutant isolated by plating a serial passage population on 192 mg/L streptomycin, Lineage 16, Clone 1 | This study       |
| <b>DA23873</b> | Mutant isolated by plating a serial passage population on 192 mg/L streptomycin, Lineage 16, Clone 2 | This study       |
| <b>DA23874</b> | Mutant isolated by plating a serial passage population on 128 mg/L streptomycin, Lineage 7, Clone 1  | This study       |
| <b>DA23875</b> | Mutant isolated by plating a serial passage population on 128 mg/L streptomycin, Lineage 7, Clone 2  | This study       |
| <b>DA23876</b> | Mutant isolated by plating a serial passage population on 128 mg/L streptomycin, Lineage 7, Clone 3  | This study       |
| <b>DA23877</b> | Mutant isolated by plating a serial passage population on 96 mg/L streptomycin, Lineage 11, Clone 1  | This study       |
| <b>DA23878</b> | Mutant isolated by plating a serial passage population on 96 mg/L streptomycin, Lineage 11, Clone 2  | This study       |
| <b>DA23879</b> | Mutant isolated by plating a serial passage population on 96 mg/L streptomycin, Lineage 9, Clone 1   | This study       |
| <b>DA23880</b> | Mutant isolated by plating a serial passage population on 96 mg/L streptomycin, Lineage 9, Clone 2   | This study       |
| <b>DA23881</b> | Mutant isolated by plating a serial passage population on 96 mg/L streptomycin, Lineage 9, Clone 3   | This study       |

**Supplementary Table 6.** Primers used for strain reconstruction. Primers with a name containing "dup" were used to amplify and insert a *cat-sacB* cassette near each gene using Lambda-Red recombineering, generating a marker-held tandem duplication, while primers with a name containing "scr" were used to screen and sequence the gene for mutations. Primer names containing 'csb' were used to amplify a *cat-sacB* cassette that was inserted into the target genes and subsequently replaced by single stranded oligos (ssLR) resulting in a gene knockout or by a *dksA* variant from *Pseudomonas aeruginosa* (*dksA2*).

| Name                | Sequence                                                                            |
|---------------------|-------------------------------------------------------------------------------------|
| gidB_dup_F          | ATGCCCGATGCGCTTTTCGCTTATCGGGCCTACAAATTTGTTAGGCTGGAGCTGCTTC                          |
| gidB_dup_R          | AAACGACGCGGCTTGTGTTAAAAATCGACAGGTATAACGCATATGAATATCCTCCTTAGTTCC                     |
| gidB_scr_F          | CGATTCGATTTTTAGCAGAC                                                                |
| gidB_scr_R          | GAAAAACAAGGTATGCTGC                                                                 |
| trkH_dup_F          | AATACCATCATCGCTATTTTCCTGCTGATCTCCGTTGTAGGCTGGAGCTGCTTC                              |
| trkH_dup_R          | CCAGTAGTCCAACGATTCCGGTAATGGCGCGAAAAATGCATATGAATATCCTCCTTAGTTCC                      |
| trkH_scr_F          | CCGAATCGTTGGACTACT                                                                  |
| trkH_scr_R          | CGGAACATAGCAGCAAGAC                                                                 |
| cyoB_dup_F          | CGATGAGATTACTAAGGCAGGGCTGAAAAATGGCAACTGATGTAGGCTGGAGCTGCTTC                         |
| cyoB_dup_R          | TAATTTTCCGAACATCTTATCTTCTCAACCCTTGGAGTTTTATATCATAAATATCTGTGCATATGAATATCCTCCTTAGTTCC |
| cyoB_scr_F          | TTACCCAGGTTTCGTCA                                                                   |
| cyoB_scr_R          | GGTCTGATGAACCTGGTG                                                                  |
| nuoG_dup_F          | TGGCGCGCTTGGAGGATCTGCGGGAGGCGCAACAATGACTTGTAGGCTGGAGCTGCTTC                         |
| nuoG_dup_R          | ATCGTAGCCATTAGCATGCTTCCAATTAATAATGCTTAATTATATCATAAATATCTGTGCATATGAATATCCTCCTTAGTTCC |
| nuoG_scr_F          | CCTCACCCAAGACCAGTA                                                                  |
| nuoG_scr_R          | ATACCAAAACGCGGAAGA                                                                  |
| znuA_dup_F          | GGGAAATGGTCACTCATGATTGAATTACTGCCC GGCTGTAGGCTGGAGCTGCTTC                            |
| znuA_dup_R          | GGACTCACCCGCTCGGTCACCTTACCGTGAACCCTGAGACATATGAATATCCTCCTTAGTTCC                     |
| znuA_scr_F          | GTGCTCAAAATCCTCAG                                                                   |
| znuA_scr_R          | CGGAGAGTTTTGCATGG                                                                   |
| znuA_csb_P1         | CGTCGGCAGCCTGGGTTGCACTCCCCAAAGCGCGCGGATGTAGGCTGGAGCTGCTTC                           |
| znuA_csb_P2         | CATTATGTTACAGAAAAATACGCTTCTTTTCGCGCATTACATATGAATATCCTCCTTAGTTCC                     |
| znuA_del_ssLR       | TATCACATTTACACATTCATTACGATGATTAGTCGCATTCGAGGAAGTGAATACGTGCAACAGATAGCCCGCTCTGTGG     |
| screen_znuA_fw      | TTATCAGAAGCGGCAAGT                                                                  |
| screen_znuA_rv      | ACCAAATGAGACCGAGAC                                                                  |
| dksA_csb_P1         | AAACTCCCGCCTGTCATAAATAGGGTAGAAAACGAACGGGAGTGTAGGCTGGAGCTGCTTC                       |
| dksA_csb_P2         | CGAACATGGGGATCGATAGTGCCTGTTAAGGAGAAGCAACCATATGAATATCCTCCTTAGTTCC                    |
| dksA_del_ssLR       | CGAACATGGGGATCGATAGTGCCTGTTAAGGAGAAGCAACTCCCGTTCTGTTCTACCTATTTATGACAGCGGGAGTTT      |
| PA_dksA2_LT2-rpl_fw | AAACTCCCGCCTGTCATAAATAGGGTAGAAAACGAACGGGATCAGTTGTGCCGCACGTG                         |
| PA_dksA2_LT2-rpl_rv | CGAACATGGGGATCGATAGTGCCTGTTAAGGAGAAGCAACATGACCGAACAGGAAGTGC                         |

**Supplementary Table 7.** Unintended mutations in the reconstructed strains. The mutations in *yebB* and *lon* were co-transduced from the isolated mutants, while the mutations in *hemG* and *gyrA* appeared during the reconstruction process.

| Strain  | <i>yebB</i> | <i>hemG</i> | <i>lon</i> | <i>gyrA</i> |
|---------|-------------|-------------|------------|-------------|
| DA40124 | wt          | P81L        | wt         | wt          |
| DA40120 | wt          | wt          | P12syn     | wt          |
| DA40130 | S54G        | wt          | wt         | wt          |
| DA40122 | wt          | wt          | P12syn     | wt          |
| DA40473 | wt          | P81L        | wt         | A386T       |
| DA40126 | wt          | P81L        | wt         | wt          |
| DA40482 | wt          | P81L        | P12syn     | wt          |
| DA40128 | wt          | P81L        | wt         | wt          |
| DA40387 | S54G        | wt          | wt         | wt          |
| DA40383 | S54G        | wt          | P12syn     | wt          |
| DA40389 | S54G        | wt          | wt         | wt          |
| DA40475 | wt          | P81L        | wt         | wt          |
| DA40483 | wt          | P81L        | wt         | wt          |
| DA40378 | wt          | P81L        | wt         | wt          |
| DA40477 | S54G        | P81L        | wt         | wt          |
| DA40385 | S54G        | P81L        | wt         | wt          |
| DA40381 | S54G        | P81L        | P12syn     | wt          |
| DA40467 | S54G        | wt          | wt         | wt          |
| DA40461 | wt          | P81L        | wt         | wt          |
| DA40465 | S54G        | P81L        | wt         | wt          |
| DA40463 | S54G        | P81L        | P12syn     | wt          |
| DA40469 | S54G        | P81L        | wt         | wt          |
| DA40479 | S54G        | P81L        | wt         | wt          |

**Supplementary Table 8.** Primers used for RT-PCR

| <b>Name</b>  | <b>Sequence</b>             |
|--------------|-----------------------------|
| qPCR_aadA_fw | GGA GGT CAC TGT CGT GCT TT  |
| qPCR_aadA_rv | ACC ATG TCC CAG TCC TGC T   |
| qPCR_iraP_fw | GGG CAC TTG AAG GCG TAA     |
| qPCR_iraP_rv | GCG CAG CAA TTC CGT ATC     |
| qPCR_cysG_fw | CCA CAG GAG GAA ATC AAC CA  |
| qPCR_cysG_rv | CGT ACC ACG CGT TTA CCT TT  |
| qPCR_hcaT_fw | ACG ATT ACC AGG CGA TTC TG  |
| qPCR_hcaT_rv | CGC TGG GAC GTA ACA ACA TAC |

### **Supplementary Reference**

1. Gillet-Markowska, A., Louvel, G. & Fischer, G. bz-rates: A Web Tool to Estimate Mutation Rates from Fluctuation Analysis. *G3 (Bethesda)* **5**, 2323-2327 (2015).
